# Supplementary material for: Oxidation of ferrocenemethanol grafted to a hydrogel network through cysteine for triggering volume phase transition
Source: Royal Society of Chemistry journal article supplement (doi:10.1039/c3ra42405g), 2013-01-01
Supplement: c3ra42405g.pdf [file c3ra42405g.pdf]

## Electronic Supplementary Information of

# Oxidation of ferrocenemethanol grafted to hydrogel network through cysteine for triggering volume phase transition

Klaudia Kaniewska, Jan Romański, Marcin Karbarz\*

Department of Chemistry, University of Warsaw, Pasteura 1, PL-02-093 Warsaw, Poland

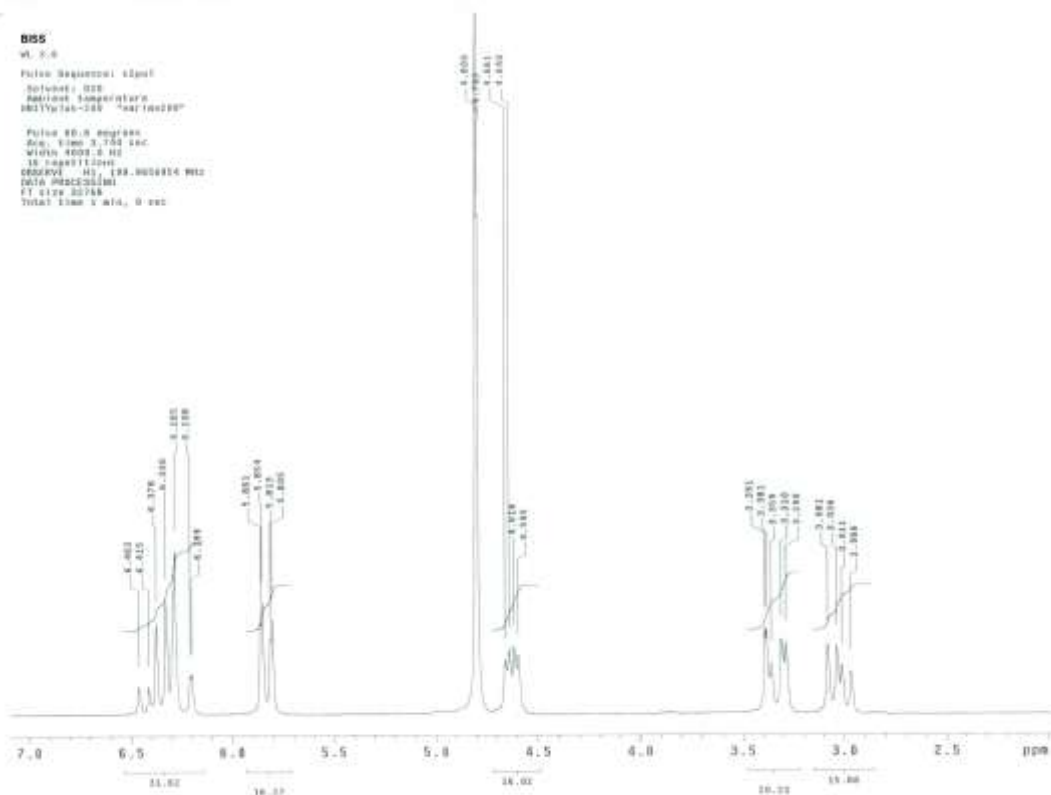

Fig.S1 <sup>1</sup>H NMR spectra of BISS monomer.

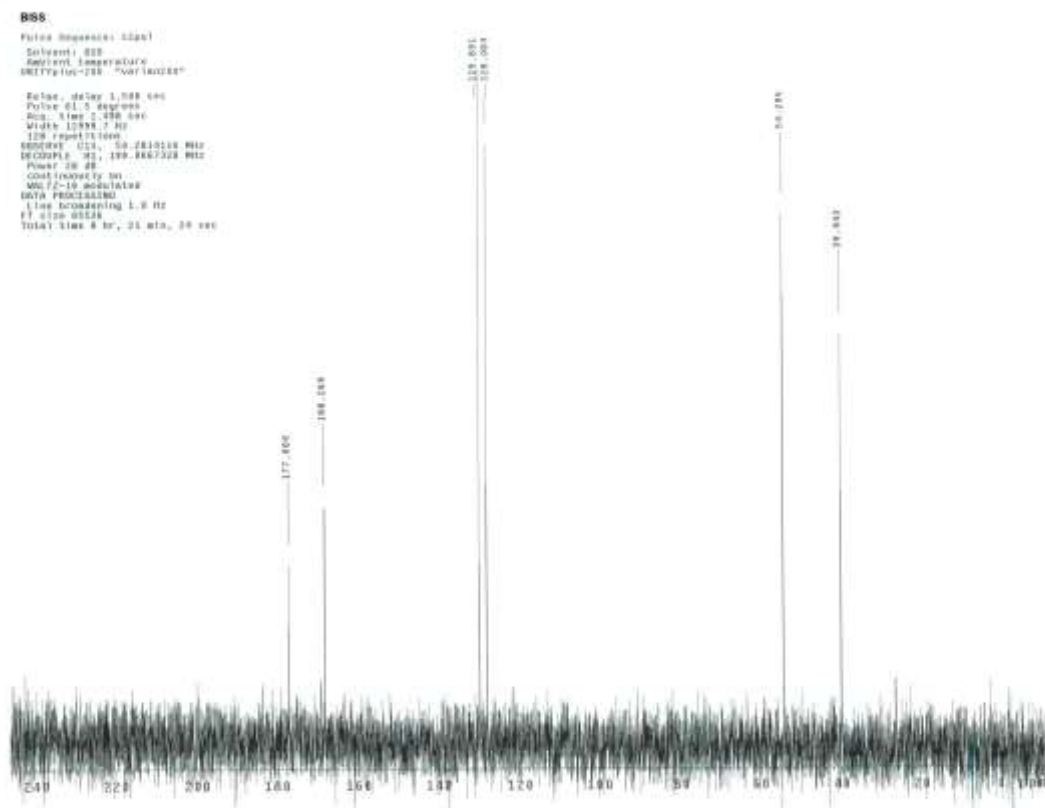

Fig.S2  $^{13}\text{C}$  NMR spectra of BISS monomer.

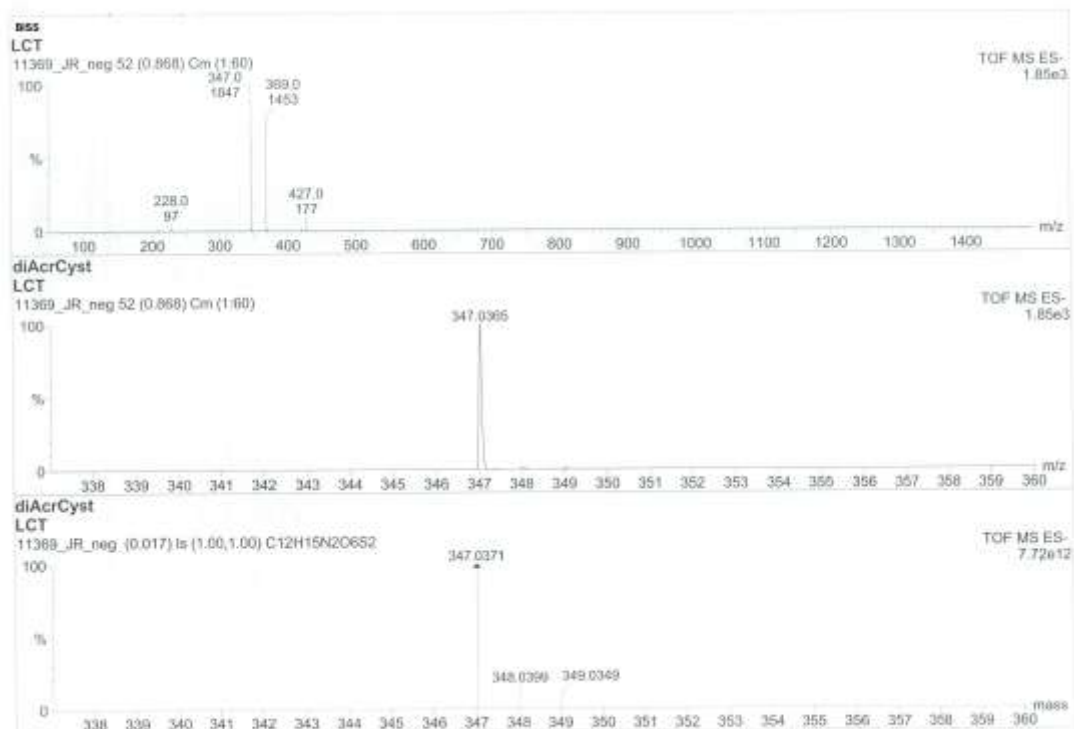

Fig.S3 MS spectra of BISS monomer.

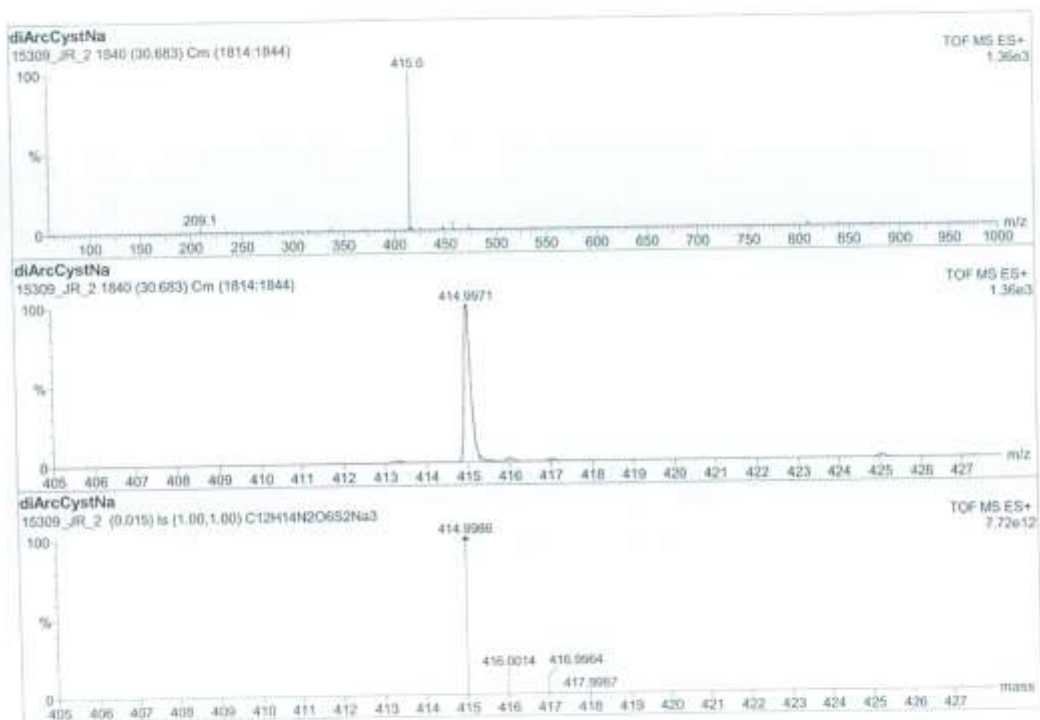

Fig.S4 MS spectra of disodium salt of BISS monomer.

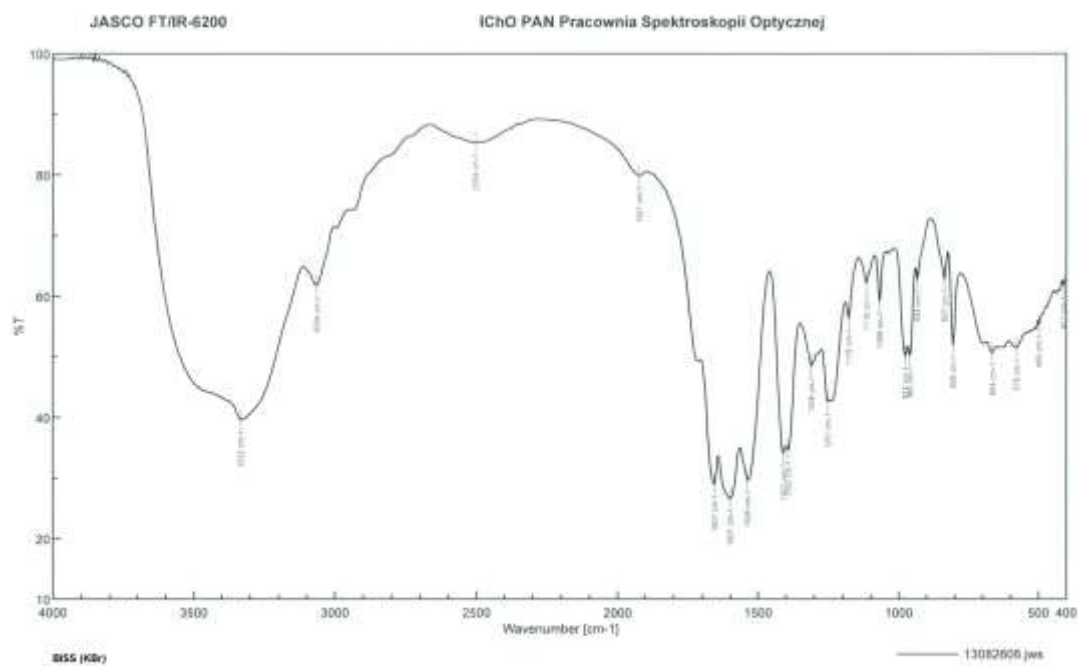

Fig.S5 IR spectra of BISS monomer.

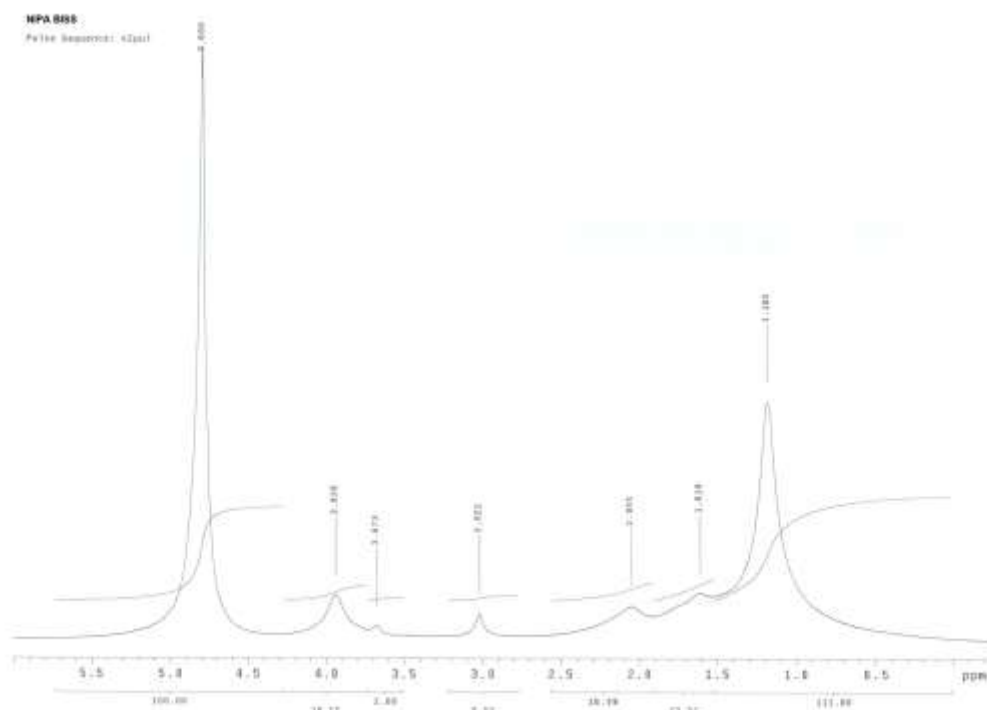

**Fig.S6**  $^1\text{H}$  NMR spectra of 6%NIPA-BISS gel.

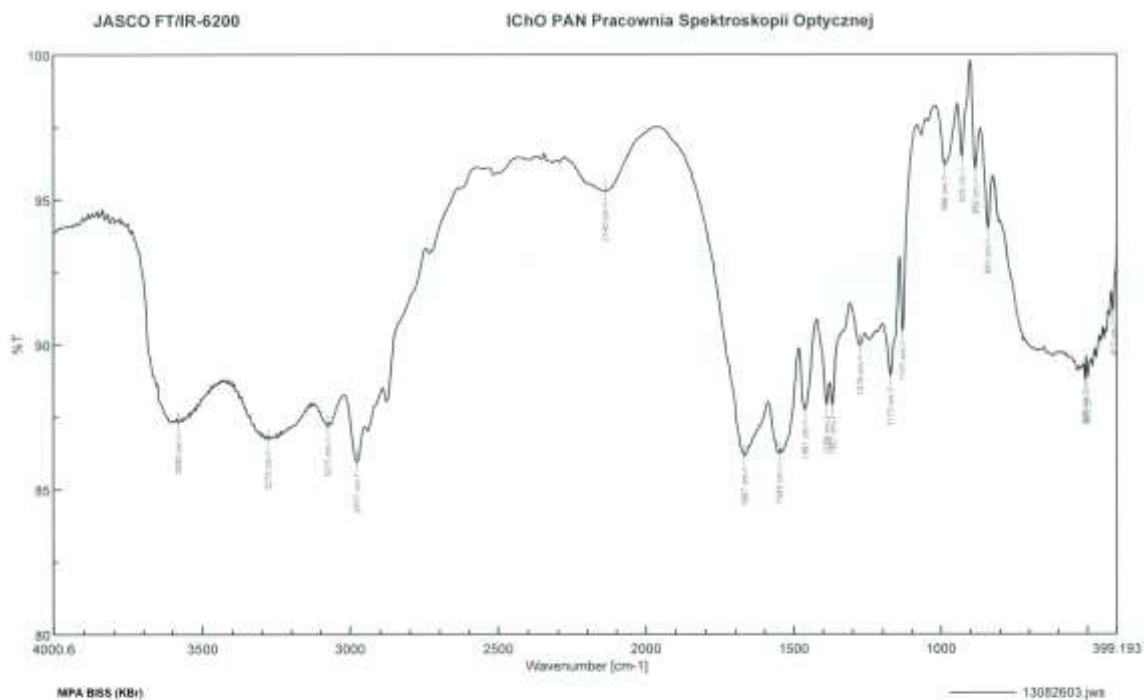

**Fig.S7** IR spectra of 6%NIPA-BISS polymer.

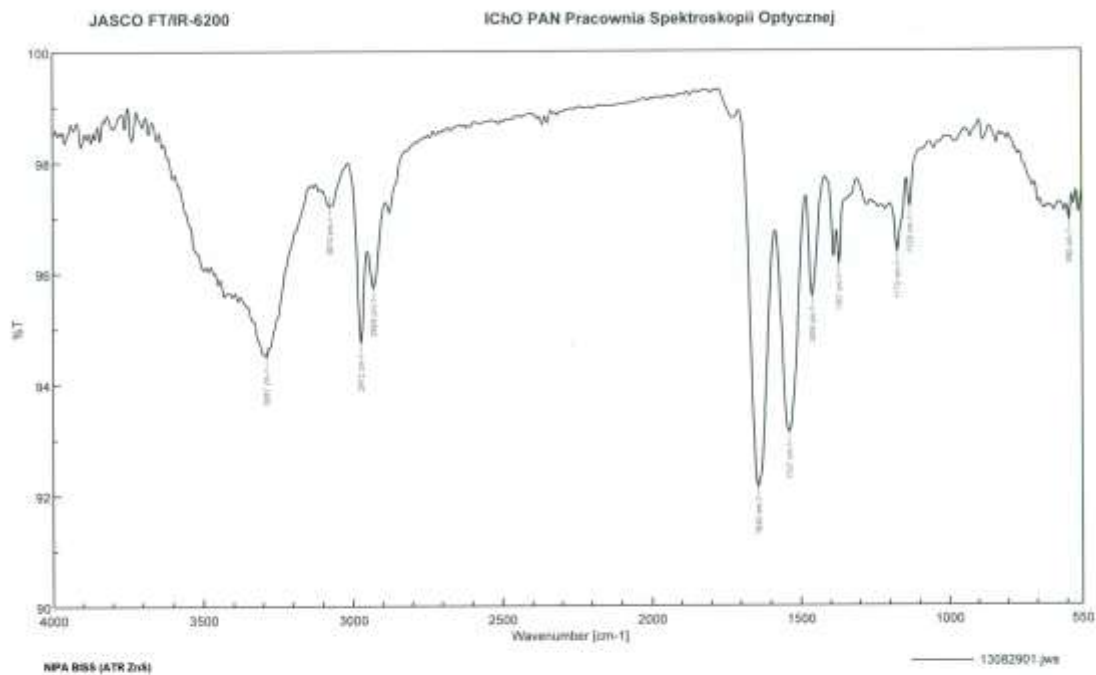

Fig.S8 IR (ATR) spectra of 6%NIPA-BISS polymer.

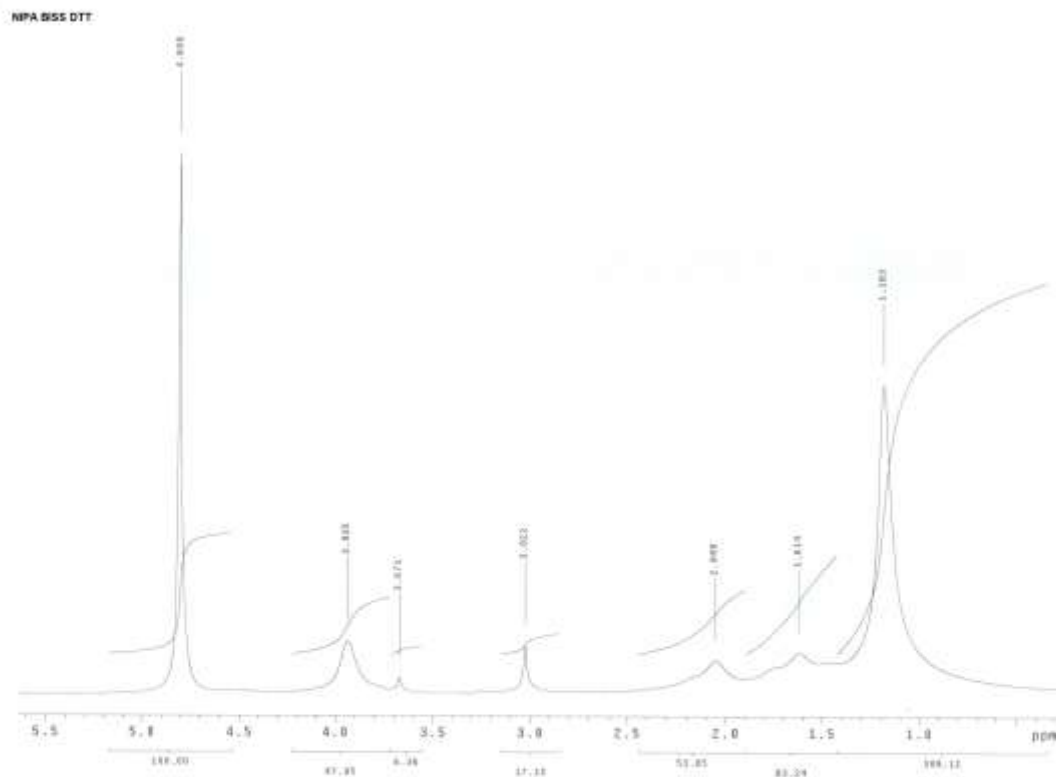

Fig.S9 <sup>1</sup>H NMR spectra of 6%NIPA-BISH gel.

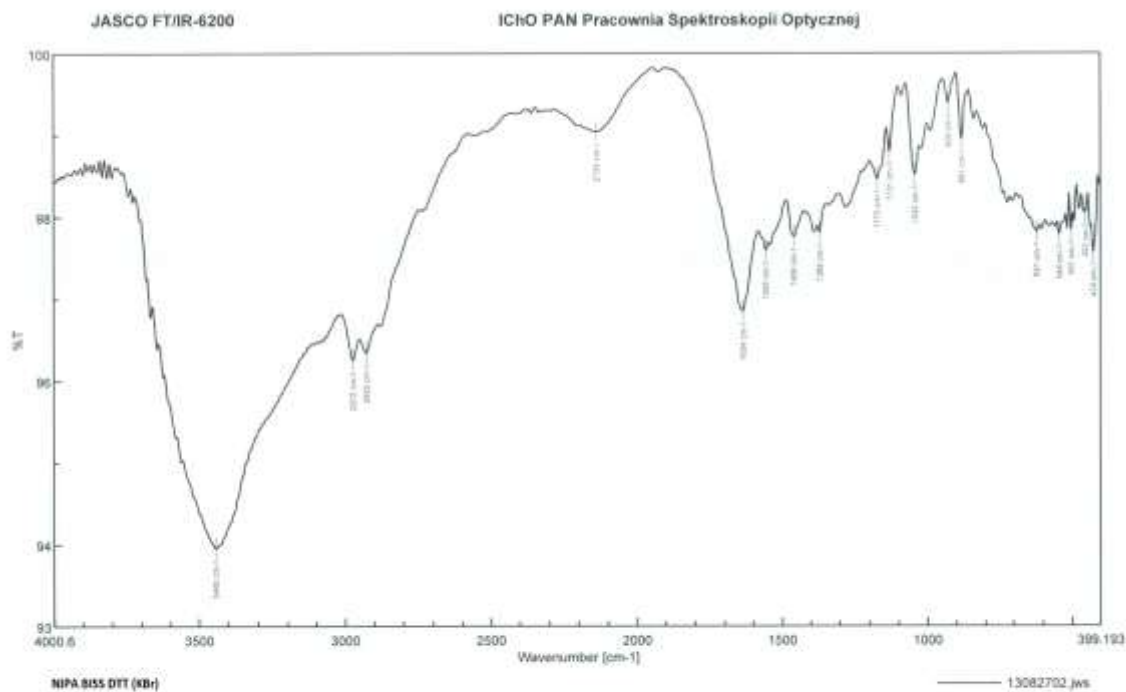

Fig.S910 IR spectra of 6%NIPA-BISH polymer.

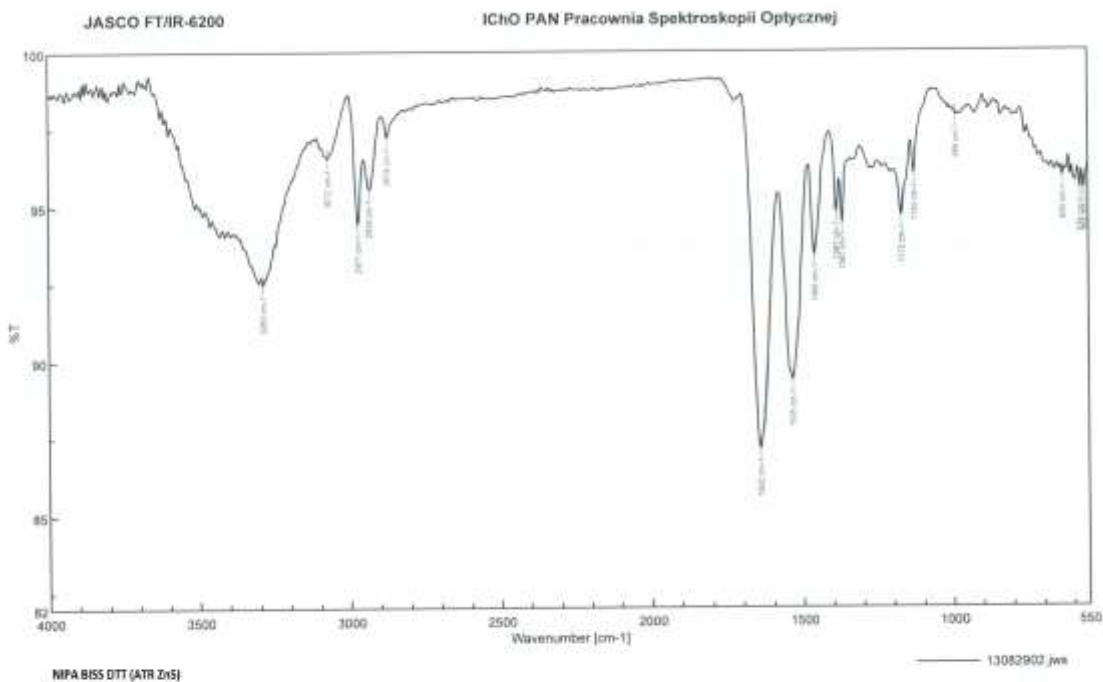

Fig.S11 IR (ATR) spectra of 6%NIPA-BISH polymer.

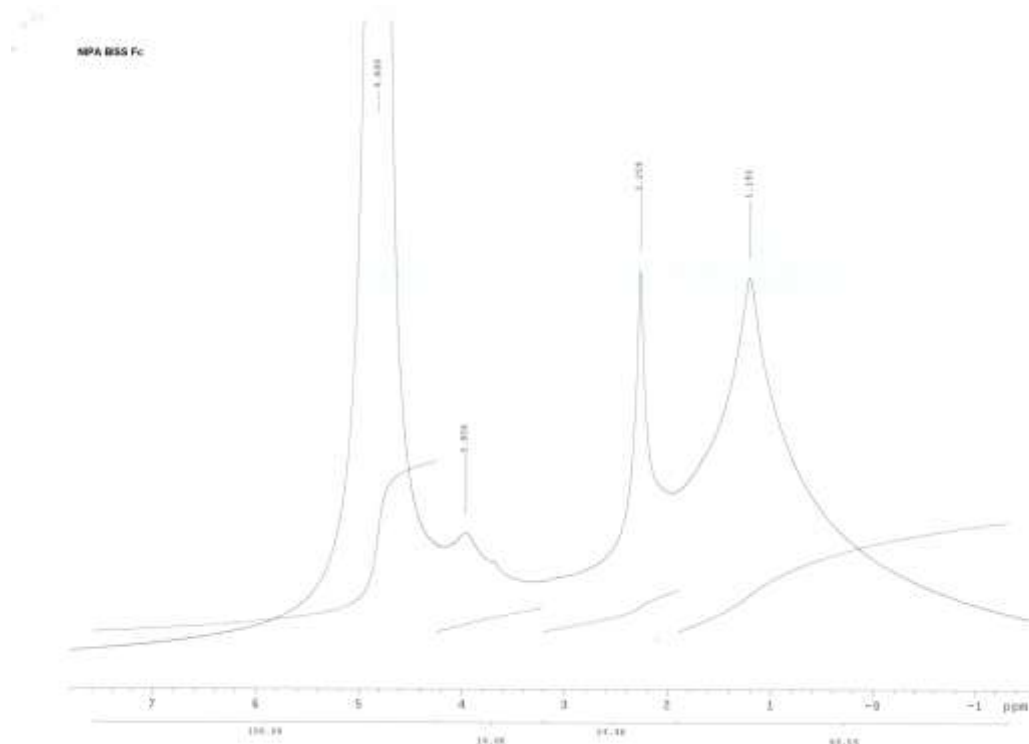

Fig.S12  $^1\text{H}$  NMR spectra of 6%NIPA-BISFc gel.

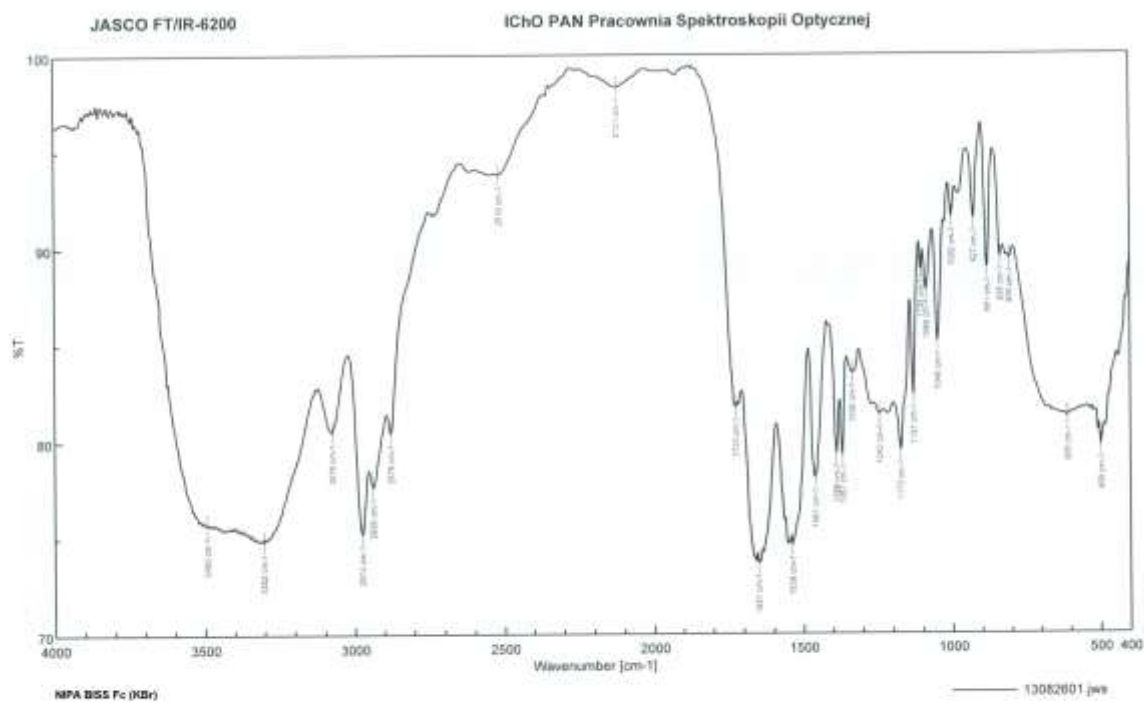

Fig.S13 IR spectra of 6%NIPA-BISFc polymer.

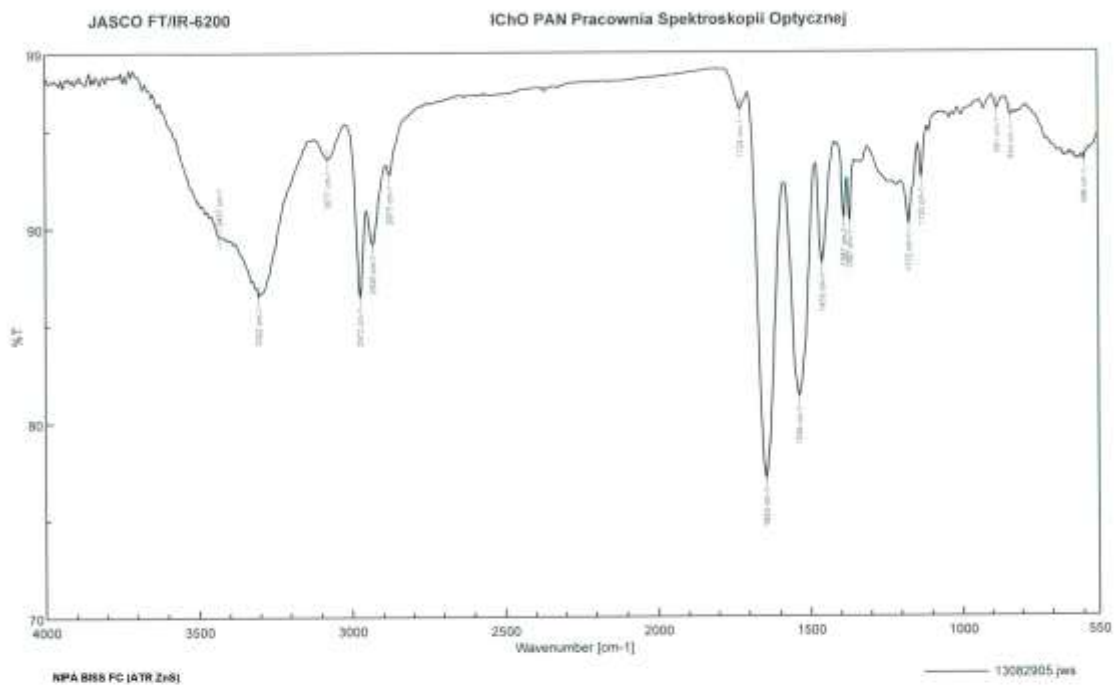

**Fig.S14** IR (ATR) spectra of 6%NIPA-BISFc polymer.
